# Supplementary material for: Proteomic and Low-Polar Metabolite Profiling Reveal Unique Dynamics in Fatty Acid Metabolism during Flower and Berry Development of Table Grapes
Source: MDPI journal article supplement (doi:10.3390/ijms242015360), 2023-10-19
Supplement: s1 [file s1]

PCA loadings plot flower stages

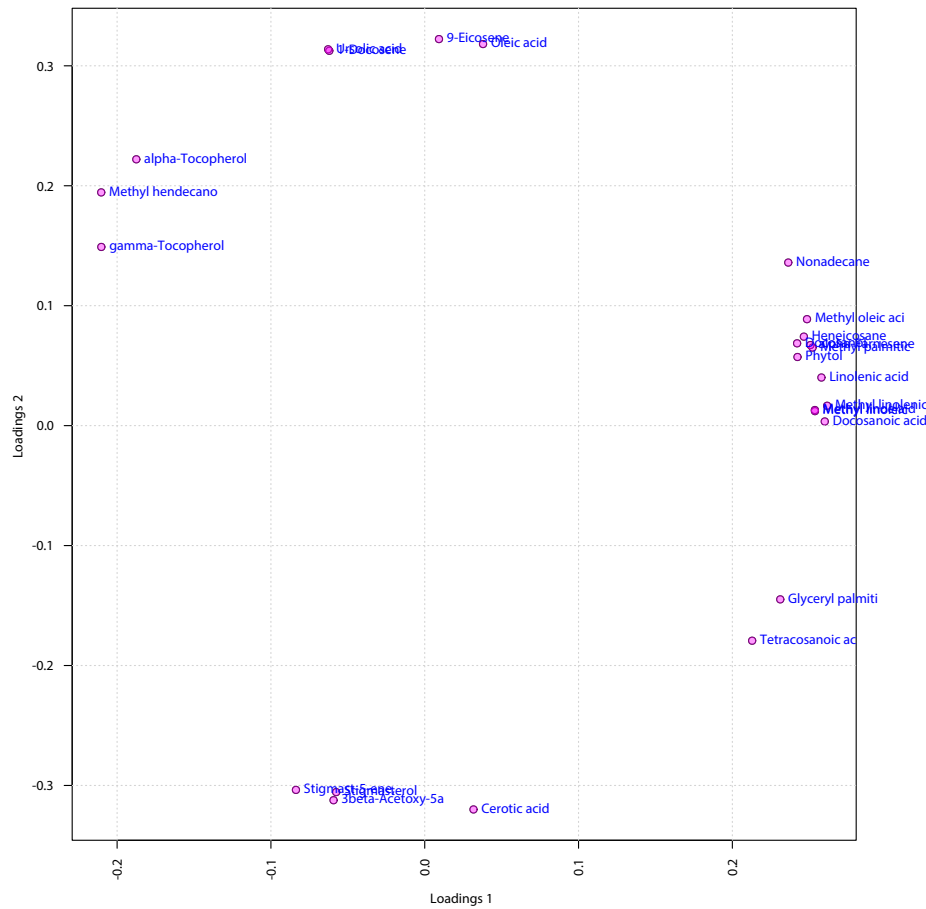

PCA loadings plot fruit stages

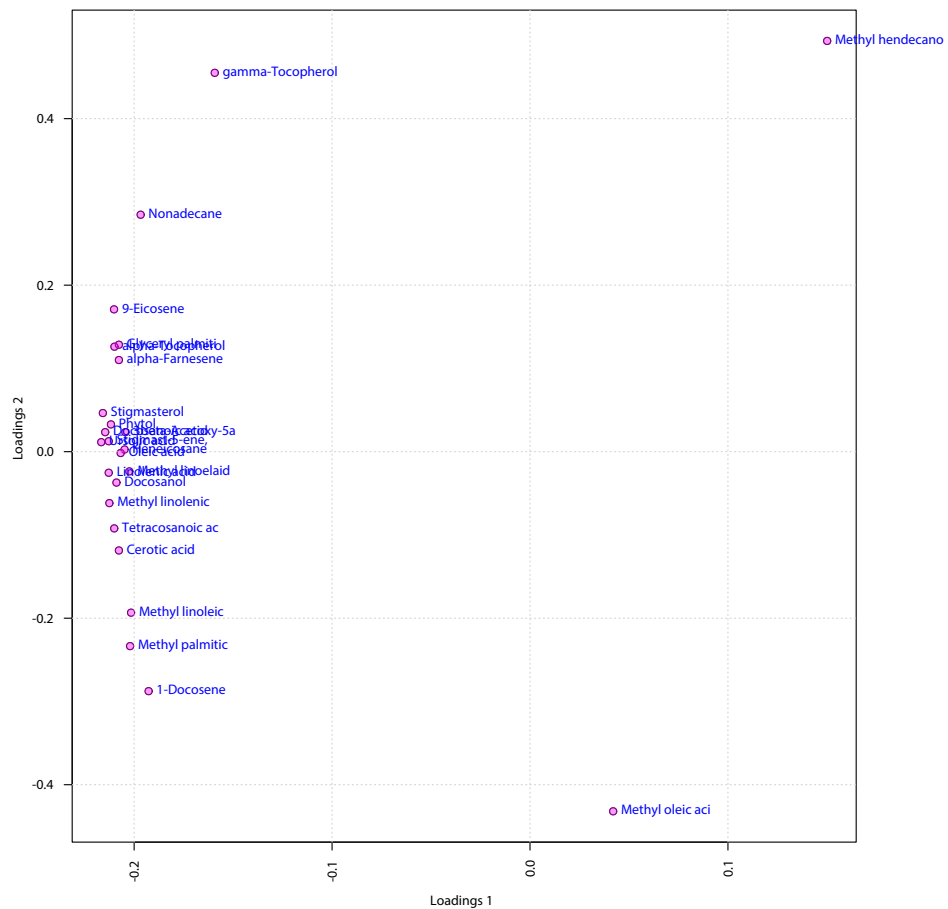

Figure S1: PCA loadings plots for low-polar metabolites at flower and fruit stages.
