# Supplementary material for: Proteomic and Low-Polar Metabolite Profiling Reveal Unique Dynamics in Fatty Acid Metabolism during Flower and Berry Development of Table Grapes
Source: MDPI journal article supplement (doi:10.3390/ijms242015360), 2023-10-19
Supplement: s1 [file s1]

| Peak no. | RT     | Metabolite name                             | Metabolite class | Molecular formula                                 | ES(+) theor-m/z | ES(+) theor-m/z | ES(-) found m/z | ES(-) theor-m/z | m/z error (ppm) | MS/MS ES(+) fragments | MS/MS S (+) CE (eV) | Reference ID | Identification level (A-D) |
|----------|--------|---------------------------------------------|------------------|---------------------------------------------------|-----------------|-----------------|-----------------|-----------------|-----------------|-----------------------|---------------------|--------------|----------------------------|
| 1        | 7.617  | Undecanoic acid, methyl ester               | Fatty acids      | C <sub>12</sub> H <sub>24</sub> O <sub>2</sub>    |                 |                 |                 |                 |                 | 74<br>87<br>55        |                     | 15607        |                            |
| 2        | 9.251  | α-Farnesene                                 | Terpenes         | C <sub>15</sub> H <sub>24</sub>                   |                 |                 |                 |                 |                 | 93<br>69<br>55        |                     | 5281516      |                            |
| 3        | 17.380 | Nonadecane                                  | Alkanes          | C <sub>19</sub> H <sub>40</sub>                   |                 |                 |                 |                 |                 | 57<br>71<br>85        |                     | 12401        |                            |
| 4        | 17.845 | Hexadecanoic acid, methyl ester             | Fatty acids      | C <sub>17</sub> H <sub>34</sub> O <sub>2</sub>    |                 |                 |                 |                 |                 | 74<br>87<br>55        |                     | 8181         |                            |
| 5        | 20.677 | 9-Eicosene                                  | Alkanes          | C <sub>20</sub> H <sub>40</sub>                   |                 |                 |                 |                 |                 | 55<br>97<br>83        |                     | 5365037      |                            |
| 6        | 20.780 | 1-Docosene                                  | Alkenes          | C <sub>22</sub> H <sub>44</sub>                   |                 |                 |                 |                 |                 | 55<br>57<br>97        |                     | 74138        |                            |
| 7        | 20.999 | 9,12-Octadecadienoic acid, methyl ester     | Fatty acids      | C <sub>19</sub> H <sub>34</sub> O <sub>2</sub>    |                 |                 |                 |                 |                 | 67<br>81<br>55        |                     | 5284421      |                            |
| 8        | 21.102 | 9,12,15-Octadecatrienoic acid, methyl ester | Fatty acids      | C <sub>19</sub> H <sub>32</sub> O <sub>2</sub>    |                 |                 |                 |                 |                 | 79<br>67<br>95        |                     | 5367462      |                            |
| 9        | 21.177 | Heneicosane                                 | Alkanes          | C <sub>21</sub> H <sub>44</sub>                   |                 |                 |                 |                 |                 | 57<br>74<br>85        |                     | 12403        |                            |
| 10       | 21.238 | trans-13-Octadecenoic acid, methyl ester    | Fatty acids      | C <sub>19</sub> H <sub>36</sub> O <sub>2</sub>    |                 |                 |                 |                 |                 | 55<br>69<br>74        |                     | 5364432      |                            |
| 11       | 22.433 | Phytol                                      | Terpenes         | C <sub>23</sub> H <sub>48</sub> OSi               |                 |                 |                 |                 |                 | 143<br>73<br>75       |                     | 5372684      |                            |
| 12       | 23.080 | Linoelaidic acid, trimethylsilyl ester      | Fatty acids      | C <sub>21</sub> H <sub>40</sub> O <sub>2</sub> Si |                 |                 |                 |                 |                 | 73<br>75<br>67        |                     | 5366424      |                            |
| 13       | 23.184 | α-Linolenic acid                            | Fatty acids      | C <sub>21</sub> H <sub>38</sub> O <sub>2</sub> Si |                 |                 |                 |                 |                 | 73<br>75<br>79        |                     | 5366426      |                            |
| 14       | 23.314 | Oleic Acid                                  | Fatty acids      | C <sub>21</sub> H <sub>42</sub> O <sub>2</sub> Si |                 |                 |                 |                 |                 | 73<br>75<br>117       |                     | 5366433      |                            |
| 15       | 28.664 | Docosanol                                   | Fatty acids      | C <sub>25</sub> H <sub>54</sub> OSi               |                 |                 |                 |                 |                 | 383                   |                     | 529830       |                            |

|    |        |                                      |             |                                                                |  |  |  |  |  |                  |  |               |  |
|----|--------|--------------------------------------|-------------|----------------------------------------------------------------|--|--|--|--|--|------------------|--|---------------|--|
|    |        |                                      |             |                                                                |  |  |  |  |  | 75<br>73         |  |               |  |
| 16 | 29.212 | 1-Monopalmitin                       | Fatty acids | C <sub>25</sub> H <sub>54</sub> O <sub>4</sub> Si <sub>2</sub> |  |  |  |  |  | 371<br>73<br>147 |  | 552917        |  |
| 17 | 29.997 | Behenic acid                         | Fatty acids | C <sub>25</sub> H <sub>52</sub> O <sub>2</sub> Si              |  |  |  |  |  | 117<br>75<br>132 |  | 522539        |  |
| 18 | 32.838 | Lignoceric acid                      | Fatty acids | C <sub>27</sub> H <sub>56</sub> O <sub>2</sub> Si              |  |  |  |  |  | 73<br>117<br>75  |  | 522540        |  |
| 19 | 34.891 | γ-Tocopherol                         | Fatty acids | C <sub>31</sub> H <sub>56</sub> O <sub>2</sub> Si              |  |  |  |  |  | 488<br>223<br>73 |  | 9175346<br>4  |  |
| 20 | 35.495 | Hexacosanoic acid                    | Fatty acids | C <sub>29</sub> H <sub>60</sub> O <sub>2</sub> Si              |  |  |  |  |  | 73<br>117<br>75  |  | 9174549<br>7  |  |
| 21 | 36.696 | α-Tocopherol                         | Fatty acids | C <sub>32</sub> H <sub>58</sub> O <sub>2</sub> Si              |  |  |  |  |  | 503<br>73<br>237 |  | 14985         |  |
| 22 | 36.849 | Lanost-8-ene-3β, 7α-diol, 3-acetate  | Fatty acids | C <sub>32</sub> H <sub>54</sub> O <sub>3</sub>                 |  |  |  |  |  | 468<br>75<br>57  |  | 7433169<br>4  |  |
| 23 | 38.465 | Stigmasterol                         | Fatty acids | C <sub>32</sub> H <sub>56</sub> OSi                            |  |  |  |  |  | 83<br>129<br>55  |  | 9169816<br>2  |  |
| 24 | 39.402 | Stigmast-5-ene, 3β-(trimethylsiloxy) | Fatty acids | C <sub>32</sub> H <sub>58</sub> OSi                            |  |  |  |  |  | 129<br>73<br>357 |  | 9174654<br>1  |  |
| 25 | 43.591 | Ursolic acid                         | Fatty acids | C <sub>36</sub> H <sub>64</sub> O <sub>3</sub> Si              |  |  |  |  |  | 203<br>73<br>202 |  | 1567003<br>46 |  |

**Table S1:** Identified low-polar metabolites by GC-MS.
